# Supplementary material for: Presence of anticitrullinated protein antibodies in a large population-based cohort from the Netherlands
Source: PubMed Central journal article supplement — Ann Rheum Dis. 2017 Jun 9;76(7):1184–90. doi: 10.1136/annrheumdis-2016-209991 (PMC5530344; doi:10.1136/annrheumdis-2016-209991), 2017-06-09
Supplement: annrheumdis-2016-209991supp001.pdf [file annrheumdis-2016-209991supp001.pdf]

**Supplementary Table 1. Assessment of risk factors: definitions and cut-off values**

| <b>Risk factor</b>                | <b>Definition</b>                                                                                                                                                                                                                                                                                                                                                                                   | <b>Cut-off values</b>                                                                                                                                                            |
|-----------------------------------|-----------------------------------------------------------------------------------------------------------------------------------------------------------------------------------------------------------------------------------------------------------------------------------------------------------------------------------------------------------------------------------------------------|----------------------------------------------------------------------------------------------------------------------------------------------------------------------------------|
| Age                               | In years, at the moment of inclusion                                                                                                                                                                                                                                                                                                                                                                |                                                                                                                                                                                  |
| Gender                            | Male/female                                                                                                                                                                                                                                                                                                                                                                                         |                                                                                                                                                                                  |
| Body mass index (BMI)             | Body weight and height were measured by physical examination and BMI (kg/m <sup>2</sup> ) was calculated. Because of the small number of participants with underweight (n=353, 0.9%), these participants were included in the normal weight group.                                                                                                                                                  | According to the WHO criteria [1]:<br>- Normal weight (BMI <25 kg/m <sup>2</sup> )<br>- Overweight (BMI ≥25 to <30 kg/m <sup>2</sup> )<br>- Obesity (BMI ≥30 kg/m <sup>2</sup> ) |
| Tobacco use                       | Tobacco usage was expressed in pack years; one pack year was defined as 20 cigarettes per day for one year [2]. A cigar equaled 5 cigarettes, a cigarillo equaled 2 cigarettes and 50 g pipe tobacco equaled 65 cigarettes. Smoking status was examined by dividing participants in groups of current, former and never smokers. A never smoker was defined as never having smoked for a full year. | Categories [3]:<br>- 0 to 10 pack years<br>- >10 to 20 pack years<br>- >20 pack years                                                                                            |
| Alcohol intake                    | Alcohol intake was calculated in g/day by using the number of days a participant had used alcohol within the past month and the number of drinks on the average day of using alcohol within the past month.                                                                                                                                                                                         | Categories [4]:<br>- 0 to 5 g/day<br>- 5 to <10 g/day<br>- 10 g/day or more                                                                                                      |
| Fish intake                       | Number of days on which fish was consumed in the past month times the average number of servings on such a day.                                                                                                                                                                                                                                                                                     |                                                                                                                                                                                  |
| Sugar-sweetened soft drink intake | Number of days on which sugar-sweetened soft drinks were consumed in the past month times the average number of servings on such a day.                                                                                                                                                                                                                                                             |                                                                                                                                                                                  |
| Periodontitis                     | Periodontitis was assessed by asking if periodontitis had ever been diagnosed by a dentist.                                                                                                                                                                                                                                                                                                         |                                                                                                                                                                                  |
| Joint complaints                  | Joint complaints were assessed using four questions asking for regular (more than a few times a week) pain and/or stiffness in the joints of hands and/or feet. Analysis was performed for the presence of either pain and/or stiffness in hands and/or feet and for both pain and stiffness in hands and/or feet.                                                                                  |                                                                                                                                                                                  |
| FDR with rheumatism               | FDR with rheumatism was defined by having at least one first-degree relative with rheumatism.                                                                                                                                                                                                                                                                                                       |                                                                                                                                                                                  |
| Menopausal status and hormone use | Menopausal status was assessed only in females ≥ 50 years old.                                                                                                                                                                                                                                                                                                                                      | Categories:<br>- Premenopausal<br>- Postmenopausal and no                                                                                                                        |

|                |                                                                                                                                               |                                                    |
|----------------|-----------------------------------------------------------------------------------------------------------------------------------------------|----------------------------------------------------|
|                |                                                                                                                                               | hormone use<br>- Postmenopausal and<br>hormone use |
| Regular menses | Females were asked to say whether their menses was regular or not. Regular menses was assessed only in females between the ages of 18 and 50. |                                                    |
| Early menarche | Early menarche was defined as entering menarche at age 10 or under.                                                                           |                                                    |

1 BMI classification. Available at: [http://apps.who.int/bmi/index.jsp?introPage=intro\\_3.html](http://apps.who.int/bmi/index.jsp?introPage=intro_3.html). Accessed 03/24, 2015.

2 NCI Dictionary of Cancer Terms. Available at: <http://www.cancer.gov/dictionary?Cdrid=306510>. Accessed 03/24, 2015.

3 Kallberg H, Ding B, Padyukov L, et al. Smoking is a major preventable risk factor for rheumatoid arthritis: estimations of risks after various exposures to cigarette smoke. *Ann Rheum Dis* 2011;70:508-11.

4 Sparks JA, Chen CY, Hiraki LT, et al. Contributions of familial rheumatoid arthritis or lupus and environmental factors to risk of rheumatoid arthritis in women: a prospective cohort study. *Arthritis Care Res (Hoboken)* 2014;66:1438-46.

**Supplementary Table 2. Medication use included in the definition of defined RA**

| <b>Traditional DMARDs</b> | <b>Biological DMARDs</b> | <b>NSAIDs</b>                                                                                                    | <b>Steroids</b>    |
|---------------------------|--------------------------|------------------------------------------------------------------------------------------------------------------|--------------------|
| Hydrochloroquine          | Etanercept               | Salicylates<br>- Carbasalate calcium<br>- Acetylsalicylic acid                                                   | Prednisone         |
| Sulfasalazine             | Adalimumab               | Acetic acid derivates<br>- Diclofenac<br>- Aceclofenac<br>- Indomethacin                                         | Methylprednisolone |
| Methotrexate              | Infliximab               | Proprionic acid derivatives<br>- Naproxen<br>- Ibuprofen<br>- Ketoprofen<br>- Flurbiprofen<br>- Tiaprofenic acid | Cortisone          |
| Leflunomide               | Golimumab                | Pyrazolones<br>- Phenylbutazone                                                                                  |                    |
| Azathioprine              | Rituximab                | Coxibs<br>- Celecoxib<br>- Etoricoxib<br>- Nabumetone                                                            |                    |
| Mercaptopurine            | Tocilizumab              |                                                                                                                  |                    |
| Ciclosporine              | Abatacept                |                                                                                                                  |                    |
| Cyclophosphamide          | Ustekinumab              |                                                                                                                  |                    |
| Gold                      | Anakinra                 |                                                                                                                  |                    |
| Mycophenolate mofetil     |                          |                                                                                                                  |                    |
| Penicillamine             |                          |                                                                                                                  |                    |

DMARDs: disease-modifying anti-rheumatic drugs; NSAIDs: non-steroidal anti-inflammatory drugs.

In the questionnaire, patients filled out the name of their medication use and the reason for prescription. Medication was then looked up using indexing in SPSS. Synonyms available for the medication named in table 1 were used as well.

**Supplementary Table 3. Baseline characteristics: participants without RA, self-reported RA participants and defined RA participants.**

|                                                                               | <b>No RA<br/>(n=39,298)</b> | <b>Self-reported<br/>RA (n=838)</b> | <b>Defined RA<br/>(n=138)</b> |
|-------------------------------------------------------------------------------|-----------------------------|-------------------------------------|-------------------------------|
| <b>Age (years)</b>                                                            | 44 (34-51)                  | 51 (45-59)                          | 52 (47-58)                    |
| <b>Gender (female)</b>                                                        | 58%                         | 63%                                 | 65%                           |
| <b>BMI (kg/m<sup>2</sup>)</b>                                                 | 25 (23-28)                  | 27 (24-29)                          | 27 (24-29)                    |
| <b>Obesity</b>                                                                | 15%                         | 22%                                 | 22%                           |
| <b>Smoking (pack years)</b>                                                   | 0 (0-8)                     | 2 (0-15)                            | 5 (0-18)                      |
| <b>Smoking status</b>                                                         |                             |                                     |                               |
| Never smoker                                                                  | 49%                         | 39%                                 | 34%                           |
| Former smoker                                                                 | 30%                         | 40%                                 | 49%                           |
| Current smoker                                                                | 21%                         | 22%                                 | 17%                           |
| <b>Alcohol intake (g/day)</b>                                                 | 3 (0-11)                    | 3 (0-9)                             | 4 (0-11)                      |
| <b>Fish intake (servings/month)</b>                                           | 5 (2-9)                     | 5 (2-9)                             | 5 (2-9)                       |
| <b>Sugar-sweetened soft drink<br/>intake (glasses/month)</b>                  | 6 (0-22)                    | 3 (0-17)                            | 5 (0-17)                      |
| <b>Periodontitis (self-reported)</b>                                          | 12%                         | 11%                                 | 14%                           |
| <b>Joint complaints: pain<br/>and/or stiffness in hands<br/>and/or feet</b>   | 20%                         | 71%                                 | 82%                           |
| <b>Joint complaints: both pain<br/>and stiffness in hands<br/>and/or feet</b> | 11%                         | 61%                                 | 73%                           |
| <b>FDR with rheumatism</b>                                                    | 14%                         | 25%                                 | 25%                           |
| <i>In females (n=23,256)</i>                                                  |                             |                                     |                               |
| <b>Nulliparity</b>                                                            | 27%                         | 14%                                 | 18%                           |
| <b>Menopausal status,<br/>categories</b>                                      |                             |                                     |                               |
| Premenopausal                                                                 | 63%                         | 64%                                 | 60%                           |
| Postmenopausal and<br>hormone use                                             | 4%                          | 3%                                  | 0%                            |
| Postmenopausal and no<br>hormone use                                          | 34%                         | 33%                                 | 40%                           |
| <b>Regular menses</b>                                                         | 78%                         | 62%                                 | 79%                           |
| <b>Age of menarche ≤10</b>                                                    | 2%                          | 3%                                  | 1%                            |

Data are presented as median (interquartile range) for continuous variables and percentages for categorical variables.
